# Supplementary material for: Integrative Features of the Yeast Phosphoproteome and Protein–Protein Interaction Map
Source: PLoS Comput Biol. 2011 Jan 27;7(1):e1001064. doi: 10.1371/journal.pcbi.1001064 (PMC3029238; doi:10.1371/journal.pcbi.1001064)
Supplement: Table S2 — List of known and predicted S. cerevisiae genes and phosphorylation annotation. (0.47 MB XLS) [file pcbi.1001064.s011.xls]

## Sheet: Supplemental Table S2
Supplemental Table S2. List of known and predicted S. cerevisiae genes and phosphorylation annotation
ORF name	Gene name	Phosphorylation
Q0045	COX1	unknown
Q0050	AI1	unknown
Q0055	AI2	yes
Q0060	AI3	unknown
Q0065	AI4	unknown
Q0070	AI5_ALPHA	yes
Q0075	AI5_BETA	unknown
Q0080	ATP8	unknown
Q0085	ATP6	unknown
Q0105	COB	unknown
Q0110	BI2	yes
Q0115	BI3	unknown
Q0120	BI4	unknown
Q0130	OLI1	unknown
Q0140	VAR1	unknown
Q0160	SCEI	unknown
Q0250	COX2	unknown
Q0255		unknown
Q0275	COX3	unknown
R0010W	FLP1	unknown
R0020C	REP1	unknown
R0030W	RAF1	unknown
R0040C	REP2	unknown
YAL001C	TFC3	yes
YAL002W	VPS8	yes
YAL003W	EFB1	yes
YAL005C	SSA1	yes
YAL007C	ERP2	unknown
YAL008W	FUN14	yes
YAL009W	SPO7	unknown
YAL010C	MDM10	yes
YAL011W	SWC3	yes
YAL012W	CYS3	yes
YAL013W	DEP1	yes
YAL014C	SYN8	unknown
YAL015C	NTG1	unknown
YAL016W	TPD3	yes
YAL017W	PSK1	yes
YAL018C		unknown
YAL019W	FUN30	yes
YAL020C	ATS1	yes
YAL021C	CCR4	yes
YAL022C	FUN26	yes
YAL023C	PMT2	yes
YAL024C	LTE1	yes
YAL025C	MAK16	yes
YAL026C	DRS2	yes
YAL027W		unknown
YAL028W	FRT2	yes
YAL029C	MYO4	yes
YAL030W	SNC1	yes
YAL031C	GIP4	yes
YAL032C	PRP45	unknown
YAL033W	POP5	unknown
YAL034C	FUN19	yes
YAL034W-A	MTW1	unknown
YAL035W	FUN12	yes
YAL036C	RBG1	unknown
YAL037C-A		unknown
YAL037W		unknown
YAL038W	CDC19	yes
YAL039C	CYC3	unknown
YAL040C	CLN3	yes
YAL041W	CDC24	yes
YAL042W	ERV46	unknown
YAL043C	PTA1	yes
YAL044C	GCV3	yes
YAL044W-A		unknown
YAL046C		unknown
YAL047C	SPC72	yes
YAL048C	GEM1	unknown
YAL049C		unknown
YAL051W	OAF1	yes
YAL053W	FLC2	yes
YAL054C	ACS1	yes
YAL055W	PEX22	unknown
YAL056W	GPB2	yes
YAL058W	CNE1	unknown
YAL059W	ECM1	yes
YAL060W	BDH1	yes
YAL061W	BDH2	unknown
YAL062W	GDH3	yes
YAL063C	FLO9	unknown
YAL063C-A		unknown
YAL064C-A		unknown
YAL064W		unknown
YAL064W-B		unknown
YAL065C		unknown
YAL067C	SEO1	yes
YAL067W-A		unknown
YAL068C	PAU8	unknown
YAR002C-A	ERP1	unknown
YAR002W	NUP60	yes
YAR003W	SWD1	unknown
YAR007C	RFA1	yes
YAR008W	SEN34	unknown
YAR014C	BUD14	yes
YAR015W	ADE1	yes
YAR018C	KIN3	unknown
YAR019C	CDC15	yes
YAR020C	PAU7	yes
YAR023C		unknown
YAR027W	UIP3	yes
YAR028W		yes
YAR029W		unknown
YAR031W	PRM9	unknown
YAR033W	MST28	yes
YAR035C-A		unknown
YAR035W	YAT1	yes
YAR042W	SWH1	yes
YAR050W	FLO1	unknown
YAR061W		unknown
YAR062W		unknown
YAR064W		unknown
YAR066W		unknown
YAR068W		unknown
YAR071W	PHO11	unknown
YBL001C	ECM15	unknown
YBL002W	HTB2	yes
YBL003C	HTA2	yes
YBL004W	UTP20	yes
YBL005W	PDR3	yes
YBL006C	LDB7	yes
YBL007C	SLA1	yes
YBL008W	HIR1	yes
YBL008W-A		unknown
YBL009W	ALK2	yes
YBL010C		yes
YBL011W	SCT1	yes
YBL013W	FMT1	unknown
YBL014C	RRN6	yes
YBL015W	ACH1	yes
YBL016W	FUS3	yes
YBL017C	PEP1	unknown
YBL018C	POP8	unknown
YBL019W	APN2	unknown
YBL020W	RFT1	unknown
YBL021C	HAP3	unknown
YBL022C	PIM1	yes
YBL023C	MCM2	yes
YBL024W	NCL1	yes
YBL025W	RRN10	unknown
YBL026W	LSM2	unknown
YBL027W	RPL19B	yes
YBL028C		unknown
YBL029C-A		unknown
YBL029W		unknown
YBL030C	PET9	yes
YBL031W	SHE1	yes
YBL032W	HEK2	yes
YBL033C	RIB1	yes
YBL034C	STU1	yes
YBL035C	POL12	yes
YBL036C		unknown
YBL037W	APL3	yes
YBL038W	MRPL16	yes
YBL039C	URA7	yes
YBL039W-B		unknown
YBL040C	ERD2	unknown
YBL041W	PRE7	yes
YBL042C	FUI1	yes
YBL043W	ECM13	unknown
YBL044W		unknown
YBL045C	COR1	yes
YBL046W	PSY4	yes
YBL047C	EDE1	yes
YBL049W	MOH1	yes
YBL050W	SEC17	yes
YBL051C	PIN4	yes
YBL052C	SAS3	yes
YBL054W		yes
YBL055C		unknown
YBL056W	PTC3	yes
YBL057C	PTH2	yes
YBL058W	SHP1	yes
YBL059C-A		unknown
YBL059W		unknown
YBL060W	YEL1	yes
YBL061C	SKT5	yes
YBL063W	KIP1	yes
YBL064C	PRX1	yes
YBL066C	SEF1	yes
YBL067C	UBP13	yes
YBL068W	PRS4	unknown
YBL069W	AST1	unknown
YBL071C-B		unknown
YBL071W-A	KTI11	unknown
YBL072C	RPS8A	yes
YBL074C	AAR2	yes
YBL075C	SSA3	yes
YBL076C	ILS1	yes
YBL078C	ATG8	unknown
YBL079W	NUP170	yes
YBL080C	PET112	unknown
YBL081W		unknown
YBL082C	ALG3	yes
YBL084C	CDC27	yes
YBL085W	BOI1	yes
YBL086C		yes
YBL087C	RPL23A	yes
YBL088C	TEL1	unknown
YBL089W	AVT5	unknown
YBL090W	MRP21	unknown
YBL091C	MAP2	yes
YBL091C-A	SCS22	unknown
YBL092W	RPL32	yes
YBL093C	ROX3	yes
YBL095W		unknown
YBL097W	BRN1	yes
YBL098W	BNA4	yes
YBL099W	ATP1	yes
YBL100W-C		unknown
YBL101C	ECM21	yes
YBL102W	SFT2	yes
YBL103C	RTG3	yes
YBL104C		yes
YBL105C	PKC1	yes
YBL106C	SRO77	yes
YBL107C		unknown
YBL108C-A	PAU9	unknown
YBL111C		unknown
YBL112C		unknown
YBL113C		yes
YBR001C	NTH2	yes
YBR002C	RER2	unknown
YBR003W	COQ1	unknown
YBR004C	GPI18	yes
YBR005W	RCR1	yes
YBR006W	UGA2	unknown
YBR007C	DSF2	yes
YBR008C	FLR1	yes
YBR009C	HHF1	yes
YBR010W	HHT1	unknown
YBR011C	IPP1	yes
YBR013C		unknown
YBR014C	GRX6	unknown
YBR015C	MNN2	unknown
YBR016W		yes
YBR017C	KAP104	unknown
YBR018C	GAL7	yes
YBR019C	GAL10	yes
YBR020W	GAL1	yes
YBR021W	FUR4	yes
YBR022W	POA1	yes
YBR023C	CHS3	yes
YBR024W	SCO2	unknown
YBR025C	OLA1	yes
YBR026C	ETR1	yes
YBR028C		yes
YBR029C	CDS1	unknown
YBR030W		unknown
YBR031W	RPL4A	yes
YBR033W	EDS1	yes
YBR034C	HMT1	unknown
YBR035C	PDX3	unknown
YBR036C	CSG2	unknown
YBR037C	SCO1	unknown
YBR038W	CHS2	yes
YBR039W	ATP3	unknown
YBR040W	FIG1	yes
YBR041W	FAT1	unknown
YBR042C	CST26	unknown
YBR043C	QDR3	yes
YBR044C	TCM62	yes
YBR045C	GIP1	unknown
YBR046C	ZTA1	unknown
YBR047W	FMP23	unknown
YBR048W	RPS11B	yes
YBR049C	REB1	yes
YBR050C	REG2	unknown
YBR052C	RFS1	unknown
YBR053C		unknown
YBR054W	YRO2	yes
YBR055C	PRP6	unknown
YBR056W		unknown
YBR057C	MUM2	unknown
YBR058C	UBP14	unknown
YBR058C-A	TSC3	yes
YBR059C	AKL1	yes
YBR060C	ORC2	yes
YBR061C	TRM7	yes
YBR062C		yes
YBR063C		yes
YBR065C	ECM2	yes
YBR066C	NRG2	yes
YBR067C	TIP1	unknown
YBR068C	BAP2	yes
YBR069C	TAT1	yes
YBR070C	ALG14	yes
YBR071W		yes
YBR072C-A		unknown
YBR072W	HSP26	yes
YBR073W	RDH54	yes
YBR074W		yes
YBR076W	ECM8	unknown
YBR077C	SLM4	unknown
YBR078W	ECM33	yes
YBR079C	RPG1	yes
YBR080C	SEC18	yes
YBR081C	SPT7	yes
YBR082C	UBC4	yes
YBR083W	TEC1	yes
YBR084C-A	RPL19A	yes
YBR084W	MIS1	yes
YBR085C-A		yes
YBR085W	AAC3	yes
YBR086C	IST2	yes
YBR087W	RFC5	unknown
YBR088C	POL30	yes
YBR089C-A	NHP6B	unknown
YBR090C		unknown
YBR091C	MRS5	unknown
YBR092C	PHO3	unknown
YBR093C	PHO5	unknown
YBR094W	PBY1	yes
YBR095C	RXT2	yes
YBR096W		unknown
YBR097W	VPS15	yes
YBR098W	MMS4	yes
YBR101C	FES1	yes
YBR102C	EXO84	yes
YBR103W	SIF2	yes
YBR104W	YMC2	unknown
YBR105C	VID24	yes
YBR106W	PHO88	yes
YBR107C	IML3	unknown
YBR108W		yes
YBR109C	CMD1	yes
YBR110W	ALG1	unknown
YBR111C	YSA1	yes
YBR111W-A	SUS1	unknown
YBR112C	CYC8	yes
YBR114W	RAD16	yes
YBR115C	LYS2	yes
YBR117C	TKL2	yes
YBR118W	TEF2	yes
YBR119W	MUD1	unknown
YBR120C	CBP6	yes
YBR121C	GRS1	yes
YBR122C	MRPL36	unknown
YBR123C	TFC1	yes
YBR125C	PTC4	yes
YBR126C	TPS1	yes
YBR127C	VMA2	yes
YBR128C	ATG14	unknown
YBR129C	OPY1	yes
YBR130C	SHE3	yes
YBR131W	CCZ1	yes
YBR132C	AGP2	yes
YBR133C	HSL7	yes
YBR135W	CKS1	unknown
YBR136W	MEC1	yes
YBR137W		unknown
YBR138C		unknown
YBR139W		unknown
YBR140C	IRA1	yes
YBR141C		yes
YBR142W	MAK5	yes
YBR143C	SUP45	yes
YBR145W	ADH5	yes
YBR146W	MRPS9	unknown
YBR147W		yes
YBR148W	YSW1	yes
YBR149W	ARA1	yes
YBR150C	TBS1	yes
YBR151W	APD1	unknown
YBR152W	SPP381	yes
YBR153W	RIB7	unknown
YBR154C	RPB5	yes
YBR155W	CNS1	unknown
YBR156C	SLI15	yes
YBR157C	ICS2	yes
YBR158W	AMN1	yes
YBR159W	IFA38	yes
YBR160W	CDC28	yes
YBR161W	CSH1	yes
YBR162C	TOS1	yes
YBR162W-A	YSY6	unknown
YBR163W	DEM1	unknown
YBR164C	ARL1	unknown
YBR165W	UBS1	unknown
YBR166C	TYR1	unknown
YBR167C	POP7	yes
YBR168W	PEX32	unknown
YBR169C	SSE2	yes
YBR170C	NPL4	unknown
YBR171W	SEC66	unknown
YBR172C	SMY2	yes
YBR173C	UMP1	yes
YBR175W	SWD3	unknown
YBR176W	ECM31	yes
YBR177C	EHT1	unknown
YBR179C	FZO1	yes
YBR180W	DTR1	unknown
YBR181C	RPS6B	yes
YBR182C	SMP1	unknown
YBR182C-A		unknown
YBR183W	YPC1	unknown
YBR184W		unknown
YBR185C	MBA1	unknown
YBR186W	PCH2	unknown
YBR187W	GDT1	unknown
YBR188C	NTC20	yes
YBR189W	RPS9B	yes
YBR191W	RPL21A	yes
YBR192W	RIM2	yes
YBR193C	MED8	yes
YBR194W	SOY1	unknown
YBR195C	MSI1	yes
YBR196C	PGI1	yes
YBR196C-A		unknown
YBR196C-B		unknown
YBR197C		yes
YBR198C	TAF5	yes
YBR199W	KTR4	yes
YBR200W	BEM1	yes
YBR200W-A		unknown
YBR201C-A		unknown
YBR201W	DER1	unknown
YBR202W	MCM7	yes
YBR203W	COS111	yes
YBR204C		unknown
YBR205W	KTR3	unknown
YBR207W	FTH1	yes
YBR208C	DUR1,2	yes
YBR210W	ERV15	unknown
YBR211C	AME1	yes
YBR212W	NGR1	yes
YBR213W	MET8	unknown
YBR214W	SDS24	yes
YBR215W	HPC2	yes
YBR216C	YBP1	unknown
YBR217W	ATG12	yes
YBR218C	PYC2	yes
YBR219C		unknown
YBR220C		unknown
YBR221C	PDB1	yes
YBR221W-A		unknown
YBR222C	PCS60	unknown
YBR223C	TDP1	unknown
YBR225W		yes
YBR227C	MCX1	unknown
YBR228W	SLX1	unknown
YBR229C	ROT2	yes
YBR230C	OM14	yes
YBR230W-A		unknown
YBR231C	SWC5	yes
YBR233W	PBP2	yes
YBR233W-A	DAD3	yes
YBR234C	ARC40	yes
YBR235W		yes
YBR236C	ABD1	unknown
YBR237W	PRP5	yes
YBR238C		yes
YBR239C		yes
YBR240C	THI2	yes
YBR241C		unknown
YBR242W		unknown
YBR243C	ALG7	unknown
YBR244W	GPX2	yes
YBR245C	ISW1	yes
YBR246W		unknown
YBR247C	ENP1	yes
YBR248C	HIS7	yes
YBR249C	ARO4	yes
YBR250W	SPO23	yes
YBR251W	MRPS5	unknown
YBR252W	DUT1	yes
YBR253W	SRB6	unknown
YBR254C	TRS20	unknown
YBR255C-A		unknown
YBR255W		yes
YBR256C	RIB5	yes
YBR257W	POP4	yes
YBR258C	SHG1	yes
YBR259W		unknown
YBR260C	RGD1	yes
YBR261C		unknown
YBR262C	FMP51	unknown
YBR263W	SHM1	unknown
YBR264C	YPT10	yes
YBR265W	TSC10	unknown
YBR267W	REI1	yes
YBR268W	MRPL37	yes
YBR269C	FMP21	yes
YBR270C	BIT2	yes
YBR271W		yes
YBR272C	HSM3	unknown
YBR273C	UBX7	yes
YBR274W	CHK1	yes
YBR275C	RIF1	yes
YBR276C	PPS1	yes
YBR278W	DPB3	yes
YBR279W	PAF1	yes
YBR280C	SAF1	yes
YBR281C	DUG2	yes
YBR282W	MRPL27	unknown
YBR283C	SSH1	unknown
YBR284W		unknown
YBR285W		yes
YBR286W	APE3	unknown
YBR287W	ZSP1	yes
YBR288C	APM3	yes
YBR289W	SNF5	yes
YBR290W	BSD2	yes
YBR291C	CTP1	yes
YBR293W	VBA2	unknown
YBR294W	SUL1	unknown
YBR295W	PCA1	yes
YBR296C	PHO89	yes
YBR296C-A		unknown
YBR297W	MAL33	unknown
YBR298C	MAL31	unknown
YBR298C-A		unknown
YBR299W	MAL32	unknown
YBR301W	DAN3	unknown
YBR302C	COS2	yes
YCL001W	RER1	unknown
YCL001W-A		unknown
YCL001W-B		unknown
YCL002C		unknown
YCL004W	PGS1	yes
YCL005W	LDB16	yes
YCL005W-A	VMA9	unknown
YCL008C	STP22	unknown
YCL009C	ILV6	yes
YCL010C	SGF29	yes
YCL011C	GBP2	yes
YCL012C		yes
YCL014W	BUD3	yes
YCL016C	DCC1	yes
YCL017C	NFS1	yes
YCL018W	LEU2	yes
YCL021W-A		unknown
YCL024W	KCC4	yes
YCL025C	AGP1	yes
YCL026C-A	FRM2	yes
YCL026C-B	HBN1	unknown
YCL027W	FUS1	yes
YCL028W	RNQ1	yes
YCL029C	BIK1	yes
YCL030C	HIS4	yes
YCL031C	RRP7	unknown
YCL032W	STE50	yes
YCL033C		unknown
YCL034W	LSB5	yes
YCL035C	GRX1	unknown
YCL036W	GFD2	yes
YCL037C	SRO9	yes
YCL038C	ATG22	yes
YCL039W	GID7	yes
YCL040W	GLK1	yes
YCL042W		unknown
YCL043C	PDI1	unknown
YCL044C	MGR1	yes
YCL045C		yes
YCL047C		unknown
YCL048W	SPS22	unknown
YCL048W-A		unknown
YCL049C		unknown
YCL050C	APA1	yes
YCL051W	LRE1	yes
YCL052C	PBN1	yes
YCL054W	SPB1	yes
YCL055W	KAR4	yes
YCL056C		unknown
YCL057C-A		unknown
YCL057W	PRD1	yes
YCL058W-A		unknown
YCL059C	KRR1	yes
YCL061C	MRC1	yes
YCL063W	VAC17	yes
YCL064C	CHA1	unknown
YCL066W	HMLALPHA1	unknown
YCL067C	HMLALPHA2	unknown
YCL068C		unknown
YCL069W	VBA3	unknown
YCL073C		unknown
YCL074W		unknown
YCL075W		unknown
YCR002C	CDC10	yes
YCR003W	MRPL32	unknown
YCR004C	YCP4	unknown
YCR005C	CIT2	yes
YCR007C		unknown
YCR008W	SAT4	yes
YCR009C	RVS161	yes
YCR010C	ADY2	yes
YCR011C	ADP1	yes
YCR012W	PGK1	yes
YCR014C	POL4	unknown
YCR015C		unknown
YCR016W		yes
YCR017C	CWH43	yes
YCR018C	SRD1	unknown
YCR019W	MAK32	yes
YCR020C	PET18	unknown
YCR020C-A	MAK31	unknown
YCR020W-B	HTL1	unknown
YCR021C	HSP30	yes
YCR023C		yes
YCR024C	SLM5	unknown
YCR024C-A	PMP1	unknown
YCR024C-B		unknown
YCR026C	NPP1	yes
YCR027C	RHB1	unknown
YCR028C	FEN2	unknown
YCR028C-A	RIM1	unknown
YCR030C	SYP1	yes
YCR031C	RPS14A	yes
YCR032W	BPH1	yes
YCR033W	SNT1	yes
YCR034W	FEN1	yes
YCR035C	RRP43	yes
YCR036W	RBK1	unknown
YCR037C	PHO87	yes
YCR038C	BUD5	unknown
YCR039C	MATALPHA2	unknown
YCR040W	MATALPHA1	unknown
YCR042C	TAF2	yes
YCR043C		unknown
YCR044C	PER1	unknown
YCR045C		unknown
YCR046C	IMG1	unknown
YCR047C	BUD23	unknown
YCR048W	ARE1	yes
YCR050C		unknown
YCR051W		yes
YCR052W	RSC6	yes
YCR053W	THR4	yes
YCR054C	CTR86	yes
YCR057C	PWP2	yes
YCR059C	YIH1	unknown
YCR060W	TAH1	unknown
YCR061W		yes
YCR063W	BUD31	unknown
YCR065W	HCM1	yes
YCR066W	RAD18	yes
YCR067C	SED4	yes
YCR068W	ATG15	unknown
YCR069W	CPR4	unknown
YCR071C	IMG2	unknown
YCR072C	RSA4	yes
YCR073C	SSK22	yes
YCR073W-A	SOL2	yes
YCR075C	ERS1	unknown
YCR075W-A		unknown
YCR076C		unknown
YCR077C	PAT1	yes
YCR079W	PTC6	unknown
YCR081W	SRB8	unknown
YCR082W	AHC2	unknown
YCR083W	TRX3	unknown
YCR084C	TUP1	yes
YCR086W	CSM1	unknown
YCR087C-A	LUG1	yes
YCR088W	ABP1	yes
YCR089W	FIG2	unknown
YCR090C		unknown
YCR091W	KIN82	yes
YCR092C	MSH3	unknown
YCR093W	CDC39	yes
YCR094W	CDC50	unknown
YCR095C	OCA4	yes
YCR095W-A		unknown
YCR096C	HMRA2	unknown
YCR097W	HMRA1	unknown
YCR098C	GIT1	yes
YCR099C		yes
YCR100C		unknown
YCR101C		unknown
YCR102C		unknown
YCR104W	PAU3	unknown
YCR105W	ADH7	yes
YCR106W	RDS1	yes
YCR107W	AAD3	unknown
YCR108C		unknown
YDL001W	RMD1	unknown
YDL002C	NHP10	yes
YDL003W	MCD1	yes
YDL004W	ATP16	yes
YDL005C	MED2	yes
YDL006W	PTC1	yes
YDL007C-A		unknown
YDL007W	RPT2	yes
YDL008W	APC11	unknown
YDL010W	GRX7	unknown
YDL012C		unknown
YDL013W	SLX5	yes
YDL014W	NOP1	yes
YDL015C	TSC13	unknown
YDL017W	CDC7	yes
YDL018C	ERP3	yes
YDL019C	OSH2	yes
YDL020C	RPN4	yes
YDL021W	GPM2	yes
YDL022W	GPD1	yes
YDL024C	DIA3	unknown
YDL025C		yes
YDL027C		unknown
YDL028C	MPS1	yes
YDL029W	ARP2	yes
YDL030W	PRP9	unknown
YDL031W	DBP10	yes
YDL033C	SLM3	unknown
YDL035C	GPR1	yes
YDL036C	PUS9	yes
YDL037C	BSC1	unknown
YDL038C		unknown
YDL039C	PRM7	unknown
YDL040C	NAT1	yes
YDL042C	SIR2	yes
YDL043C	PRP11	yes
YDL044C	MTF2	unknown
YDL045C	FAD1	yes
YDL045W-A	MRP10	unknown
YDL046W	NPC2	unknown
YDL047W	SIT4	unknown
YDL048C	STP4	yes
YDL049C	KNH1	yes
YDL051W	LHP1	yes
YDL052C	SLC1	yes
YDL053C	PBP4	yes
YDL054C	MCH1	yes
YDL055C	PSA1	yes
YDL056W	MBP1	yes
YDL057W		yes
YDL058W	USO1	yes
YDL059C	RAD59	unknown
YDL060W	TSR1	yes
YDL061C	RPS29B	yes
YDL063C		yes
YDL064W	UBC9	unknown
YDL065C	PEX19	yes
YDL066W	IDP1	unknown
YDL067C	COX9	unknown
YDL069C	CBS1	unknown
YDL070W	BDF2	yes
YDL072C	YET3	yes
YDL073W		yes
YDL074C	BRE1	unknown
YDL075W	RPL31A	yes
YDL076C	RXT3	unknown
YDL077C	VAM6	yes
YDL078C	MDH3	yes
YDL079C	MRK1	yes
YDL080C	THI3	yes
YDL081C	RPP1A	yes
YDL082W	RPL13A	yes
YDL083C	RPS16B	yes
YDL084W	SUB2	yes
YDL085C-A		yes
YDL085W	NDE2	unknown
YDL086W		unknown
YDL087C	LUC7	yes
YDL088C	ASM4	yes
YDL089W		yes
YDL090C	RAM1	yes
YDL091C	UBX3	unknown
YDL092W	SRP14	yes
YDL093W	PMT5	unknown
YDL095W	PMT1	unknown
YDL097C	RPN6	yes
YDL098C	SNU23	unknown
YDL099W	BUG1	yes
YDL100C	GET3	unknown
YDL101C	DUN1	yes
YDL102W	POL3	yes
YDL103C	QRI1	yes
YDL104C	QRI7	unknown
YDL105W	NSE4	yes
YDL106C	PHO2	yes
YDL107W	MSS2	unknown
YDL108W	KIN28	yes
YDL109C		yes
YDL110C	TMA17	yes
YDL111C	RRP42	unknown
YDL112W	TRM3	yes
YDL113C	ATG20	yes
YDL114W		unknown
YDL115C	IWR1	yes
YDL116W	NUP84	yes
YDL117W	CYK3	yes
YDL118W		unknown
YDL119C		yes
YDL120W	YFH1	unknown
YDL121C		yes
YDL122W	UBP1	yes
YDL123W	SNA4	yes
YDL124W		yes
YDL125C	HNT1	unknown
YDL126C	CDC48	yes
YDL127W	PCL2	yes
YDL128W	VCX1	unknown
YDL129W		yes
YDL130W	RPP1B	yes
YDL130W-A	STF1	yes
YDL131W	LYS21	yes
YDL132W	CDC53	unknown
YDL133C-A	RPL41B	unknown
YDL133W		yes
YDL134C	PPH21	yes
YDL135C	RDI1	yes
YDL136W	RPL35B	yes
YDL137W	ARF2	yes
YDL138W	RGT2	unknown
YDL139C	SCM3	unknown
YDL140C	RPO21	yes
YDL141W	BPL1	yes
YDL142C	CRD1	yes
YDL143W	CCT4	yes
YDL144C		unknown
YDL145C	COP1	yes
YDL146W	LDB17	yes
YDL147W	RPN5	yes
YDL148C	NOP14	unknown
YDL149W	ATG9	yes
YDL150W	RPC53	yes
YDL153C	SAS10	yes
YDL154W	MSH5	yes
YDL155W	CLB3	yes
YDL156W		yes
YDL157C		unknown
YDL159W	STE7	yes
YDL159W-A		unknown
YDL160C	DHH1	yes
YDL160C-A		unknown
YDL161W	ENT1	yes
YDL164C	CDC9	yes
YDL165W	CDC36	unknown
YDL166C	FAP7	yes
YDL167C	NRP1	yes
YDL168W	SFA1	unknown
YDL169C	UGX2	yes
YDL170W	UGA3	unknown
YDL171C	GLT1	yes
YDL173W		yes
YDL174C	DLD1	unknown
YDL175C	AIR2	yes
YDL176W		yes
YDL177C		unknown
YDL178W	DLD2	unknown
YDL179W	PCL9	unknown
YDL180W		yes
YDL181W	INH1	yes
YDL182W	LYS20	yes
YDL183C		unknown
YDL184C	RPL41A	unknown
YDL185W	TFP1	yes
YDL186W		unknown
YDL188C	PPH22	yes
YDL189W	RBS1	yes
YDL190C	UFD2	unknown
YDL191W	RPL35A	yes
YDL192W	ARF1	yes
YDL193W	NUS1	yes
YDL194W	SNF3	yes
YDL195W	SEC31	yes
YDL197C	ASF2	yes
YDL198C	GGC1	unknown
YDL199C		yes
YDL200C	MGT1	unknown
YDL201W	TRM8	yes
YDL202W	MRPL11	unknown
YDL203C	ACK1	yes
YDL204W	RTN2	yes
YDL205C	HEM3	yes
YDL206W		yes
YDL207W	GLE1	yes
YDL208W	NHP2	unknown
YDL209C	CWC2	yes
YDL210W	UGA4	unknown
YDL211C		yes
YDL212W	SHR3	unknown
YDL213C	NOP6	yes
YDL214C	PRR2	unknown
YDL215C	GDH2	yes
YDL216C	RRI1	yes
YDL217C	TIM22	unknown
YDL218W		unknown
YDL219W	DTD1	unknown
YDL220C	CDC13	yes
YDL222C	FMP45	yes
YDL223C	HBT1	yes
YDL224C	WHI4	yes
YDL225W	SHS1	yes
YDL226C	GCS1	yes
YDL227C	HO	yes
YDL229W	SSB1	yes
YDL230W	PTP1	unknown
YDL231C	BRE4	yes
YDL232W	OST4	unknown
YDL233W		yes
YDL234C	GYP7	yes
YDL235C	YPD1	unknown
YDL236W	PHO13	yes
YDL237W		yes
YDL238C	GUD1	yes
YDL239C	ADY3	unknown
YDL240W	LRG1	yes
YDL241W		unknown
YDL243C	AAD4	unknown
YDL244W	THI13	unknown
YDL245C	HXT15	yes
YDL246C	SOR2	unknown
YDL247W	MPH2	unknown
YDL248W	COS7	unknown
YDR001C	NTH1	yes
YDR002W	YRB1	yes
YDR003W	RCR2	yes
YDR003W-A		unknown
YDR004W	RAD57	unknown
YDR005C	MAF1	yes
YDR006C	SOK1	yes
YDR007W	TRP1	unknown
YDR009W	GAL3	unknown
YDR011W	SNQ2	yes
YDR012W	RPL4B	yes
YDR013W	PSF1	unknown
YDR014W	RAD61	yes
YDR014W-A	HED1	unknown
YDR016C	DAD1	yes
YDR017C	KCS1	yes
YDR018C		yes
YDR019C	GCV1	unknown
YDR020C		unknown
YDR021W	FAL1	yes
YDR022C	CIS1	yes
YDR023W	SES1	yes
YDR025W	RPS11A	yes
YDR026C		yes
YDR027C	VPS54	yes
YDR028C	REG1	yes
YDR030C	RAD28	unknown
YDR031W	MIC14	unknown
YDR032C	PST2	yes
YDR033W	MRH1	yes
YDR034C	LYS14	yes
YDR034C-A		unknown
YDR034W-B		unknown
YDR035W	ARO3	yes
YDR036C	EHD3	unknown
YDR037W	KRS1	yes
YDR038C	ENA5	yes
YDR039C	ENA2	unknown
YDR040C	ENA1	yes
YDR041W	RSM10	yes
YDR042C		unknown
YDR043C	NRG1	yes
YDR044W	HEM13	yes
YDR045C	RPC11	unknown
YDR046C	BAP3	unknown
YDR047W	HEM12	unknown
YDR049W		yes
YDR050C	TPI1	yes
YDR051C		yes
YDR052C	DBF4	yes
YDR054C	CDC34	yes
YDR055W	PST1	yes
YDR056C		unknown
YDR057W	YOS9	unknown
YDR058C	TGL2	unknown
YDR059C	UBC5	unknown
YDR060W	MAK21	yes
YDR061W		unknown
YDR062W	LCB2	unknown
YDR063W		yes
YDR064W	RPS13	yes
YDR065W		unknown
YDR066C		unknown
YDR067C	OCA6	yes
YDR068W	DOS2	yes
YDR069C	DOA4	yes
YDR070C	FMP16	unknown
YDR071C	PAA1	unknown
YDR072C	IPT1	yes
YDR073W	SNF11	unknown
YDR074W	TPS2	yes
YDR075W	PPH3	unknown
YDR076W	RAD55	yes
YDR077W	SED1	unknown
YDR078C	SHU2	unknown
YDR079C-A	TFB5	unknown
YDR079W	PET100	unknown
YDR080W	VPS41	yes
YDR081C	PDC2	yes
YDR082W	STN1	yes
YDR083W	RRP8	yes
YDR084C	TVP23	unknown
YDR085C	AFR1	yes
YDR086C	SSS1	yes
YDR087C	RRP1	yes
YDR088C	SLU7	yes
YDR089W		yes
YDR090C		yes
YDR091C	RLI1	yes
YDR092W	UBC13	unknown
YDR093W	DNF2	yes
YDR096W	GIS1	yes
YDR097C	MSH6	yes
YDR098C	GRX3	unknown
YDR099W	BMH2	yes
YDR100W	TVP15	yes
YDR101C	ARX1	unknown
YDR103W	STE5	yes
YDR104C	SPO71	yes
YDR105C	TMS1	unknown
YDR106W	ARP10	unknown
YDR107C	TMN2	unknown
YDR108W	GSG1	yes
YDR109C		yes
YDR110W	FOB1	yes
YDR111C	ALT2	unknown
YDR113C	PDS1	yes
YDR114C		unknown
YDR115W		unknown
YDR116C	MRPL1	unknown
YDR117C	TMA64	yes
YDR118W	APC4	yes
YDR119W		yes
YDR119W-A		unknown
YDR120C	TRM1	yes
YDR121W	DPB4	yes
YDR122W	KIN1	yes
YDR123C	INO2	unknown
YDR124W		unknown
YDR125C	ECM18	unknown
YDR126W	SWF1	unknown
YDR127W	ARO1	yes
YDR128W		yes
YDR129C	SAC6	yes
YDR130C	FIN1	yes
YDR131C		yes
YDR132C		yes
YDR134C		unknown
YDR135C	YCF1	yes
YDR137W	RGP1	yes
YDR138W	HPR1	yes
YDR139C	RUB1	unknown
YDR140W	MTQ2	unknown
YDR141C	DOP1	yes
YDR142C	PEX7	unknown
YDR143C	SAN1	yes
YDR144C	MKC7	yes
YDR145W	TAF12	yes
YDR146C	SWI5	yes
YDR147W	EKI1	yes
YDR148C	KGD2	yes
YDR150W	NUM1	yes
YDR151C	CTH1	unknown
YDR152W	GIR2	unknown
YDR153C	ENT5	yes
YDR155C	CPR1	yes
YDR156W	RPA14	yes
YDR158W	HOM2	yes
YDR159W	SAC3	yes
YDR160W	SSY1	unknown
YDR161W		yes
YDR162C	NBP2	yes
YDR163W	CWC15	yes
YDR164C	SEC1	yes
YDR165W	TRM82	yes
YDR166C	SEC5	yes
YDR167W	TAF10	yes
YDR168W	CDC37	yes
YDR169C	STB3	yes
YDR169C-A		unknown
YDR170C	SEC7	yes
YDR171W	HSP42	yes
YDR172W	SUP35	yes
YDR173C	ARG82	yes
YDR174W	HMO1	unknown
YDR175C	RSM24	unknown
YDR176W	NGG1	yes
YDR177W	UBC1	unknown
YDR178W	SDH4	unknown
YDR179C	CSN9	unknown
YDR179W-A		unknown
YDR180W	SCC2	yes
YDR181C	SAS4	yes
YDR182W	CDC1	yes
YDR182W-A		unknown
YDR183W	PLP1	yes
YDR184C	ATC1	yes
YDR185C		unknown
YDR186C		yes
YDR188W	CCT6	yes
YDR189W	SLY1	yes
YDR190C	RVB1	yes
YDR191W	HST4	unknown
YDR192C	NUP42	yes
YDR194C	MSS116	unknown
YDR194W-A		unknown
YDR195W	REF2	yes
YDR196C		unknown
YDR197W	CBS2	unknown
YDR198C	RKM2	yes
YDR200C	VPS64	yes
YDR201W	SPC19	yes
YDR202C	RAV2	unknown
YDR204W	COQ4	unknown
YDR205W	MSC2	unknown
YDR206W	EBS1	yes
YDR207C	UME6	yes
YDR208W	MSS4	yes
YDR210W		unknown
YDR211W	GCD6	yes
YDR212W	TCP1	yes
YDR213W	UPC2	yes
YDR214W	AHA1	yes
YDR216W	ADR1	yes
YDR217C	RAD9	yes
YDR218C	SPR28	yes
YDR219C	MFB1	yes
YDR221W	GTB1	yes
YDR222W		unknown
YDR223W	CRF1	unknown
YDR224C	HTB1	yes
YDR225W	HTA1	yes
YDR226W	ADK1	yes
YDR227W	SIR4	yes
YDR228C	PCF11	unknown
YDR229W	IVY1	yes
YDR231C	COX20	yes
YDR232W	HEM1	yes
YDR233C	RTN1	yes
YDR234W	LYS4	unknown
YDR235W	PRP42	unknown
YDR236C	FMN1	yes
YDR237W	MRPL7	unknown
YDR238C	SEC26	yes
YDR239C		yes
YDR240C	SNU56	yes
YDR242W	AMD2	unknown
YDR243C	PRP28	yes
YDR244W	PEX5	yes
YDR245W	MNN10	unknown
YDR246W	TRS23	unknown
YDR246W-A		unknown
YDR247W	VHS1	unknown
YDR248C		unknown
YDR249C		unknown
YDR251W	PAM1	yes
YDR252W	BTT1	unknown
YDR253C	MET32	unknown
YDR254W	CHL4	unknown
YDR255C	RMD5	unknown
YDR256C	CTA1	unknown
YDR257C	SET7	yes
YDR258C	HSP78	yes
YDR259C	YAP6	yes
YDR260C	SWM1	unknown
YDR261C	EXG2	yes
YDR262W		unknown
YDR263C	DIN7	unknown
YDR264C	AKR1	yes
YDR265W	PEX10	unknown
YDR266C		yes
YDR267C	CIA1	unknown
YDR268W	MSW1	unknown
YDR270W	CCC2	unknown
YDR272W	GLO2	yes
YDR273W	DON1	unknown
YDR275W	BSC2	yes
YDR276C	PMP3	unknown
YDR277C	MTH1	unknown
YDR279W	RNH202	yes
YDR280W	RRP45	unknown
YDR281C	PHM6	unknown
YDR282C		unknown
YDR283C	GCN2	yes
YDR284C	DPP1	yes
YDR285W	ZIP1	yes
YDR286C		unknown
YDR287W		unknown
YDR288W	NSE3	yes
YDR289C	RTT103	yes
YDR291W	HRQ1	yes
YDR292C	SRP101	yes
YDR293C	SSD1	yes
YDR294C	DPL1	unknown
YDR295C	HDA2	unknown
YDR296W	MHR1	unknown
YDR297W	SUR2	unknown
YDR298C	ATP5	yes
YDR299W	BFR2	yes
YDR300C	PRO1	unknown
YDR301W	CFT1	yes
YDR302W	GPI11	yes
YDR303C	RSC3	yes
YDR304C	CPR5	yes
YDR305C	HNT2	unknown
YDR306C		yes
YDR307W		unknown
YDR308C	SRB7	unknown
YDR309C	GIC2	yes
YDR310C	SUM1	yes
YDR311W	TFB1	yes
YDR312W	SSF2	yes
YDR313C	PIB1	unknown
YDR314C	RAD34	unknown
YDR315C	IPK1	unknown
YDR316W	OMS1	yes
YDR317W	HIM1	yes
YDR318W	MCM21	yes
YDR319C		unknown
YDR320C	SWA2	yes
YDR320C-A	DAD4	unknown
YDR321W	ASP1	yes
YDR322C-A	TIM11	unknown
YDR322W	MRPL35	unknown
YDR323C	PEP7	unknown
YDR324C	UTP4	yes
YDR325W	YCG1	yes
YDR326C	YSP2	yes
YDR328C	SKP1	yes
YDR329C	PEX3	yes
YDR330W	UBX5	yes
YDR331W	GPI8	unknown
YDR332W	IRC3	unknown
YDR333C		yes
YDR334W	SWR1	yes
YDR335W	MSN5	unknown
YDR336W		yes
YDR337W	MRPS28	yes
YDR338C		yes
YDR339C	FCF1	unknown
YDR341C		yes
YDR342C	HXT7	yes
YDR343C	HXT6	unknown
YDR345C	HXT3	yes
YDR346C	SVF1	unknown
YDR347W	MRP1	unknown
YDR348C		yes
YDR349C	YPS7	unknown
YDR350C	ATP22	yes
YDR351W	SBE2	yes
YDR352W		yes
YDR353W	TRR1	yes
YDR354W	TRP4	unknown
YDR356W	SPC110	yes
YDR357C		yes
YDR358W	GGA1	yes
YDR359C	EAF1	yes
YDR361C	BCP1	yes
YDR362C	TFC6	yes
YDR363W	ESC2	yes
YDR363W-A	SEM1	unknown
YDR364C	CDC40	yes
YDR365C	ESF1	yes
YDR366C		unknown
YDR367W		unknown
YDR368W	YPR1	yes
YDR369C	XRS2	yes
YDR370C		unknown
YDR371W	CTS2	unknown
YDR372C	VPS74	yes
YDR373W	FRQ1	unknown
YDR374C		unknown
YDR374W-A		unknown
YDR375C	BCS1	yes
YDR376W	ARH1	yes
YDR377W	ATP17	unknown
YDR378C	LSM6	unknown
YDR379C-A		unknown
YDR379W	RGA2	yes
YDR380W	ARO10	unknown
YDR381C-A		yes
YDR381W	YRA1	yes
YDR382W	RPP2B	yes
YDR383C	NKP1	yes
YDR384C	ATO3	yes
YDR385W	EFT2	yes
YDR386W	MUS81	yes
YDR387C		yes
YDR388W	RVS167	yes
YDR389W	SAC7	yes
YDR390C	UBA2	yes
YDR391C		unknown
YDR392W	SPT3	yes
YDR393W	SHE9	yes
YDR394W	RPT3	yes
YDR395W	SXM1	yes
YDR397C	NCB2	yes
YDR398W	UTP5	yes
YDR399W	HPT1	unknown
YDR400W	URH1	unknown
YDR402C	DIT2	unknown
YDR403W	DIT1	unknown
YDR404C	RPB7	unknown
YDR405W	MRP20	unknown
YDR406W	PDR15	yes
YDR407C	TRS120	yes
YDR408C	ADE8	unknown
YDR409W	SIZ1	yes
YDR410C	STE14	yes
YDR411C	DFM1	unknown
YDR412W	RRP17	yes
YDR414C	ERD1	unknown
YDR415C		unknown
YDR416W	SYF1	unknown
YDR418W	RPL12B	yes
YDR419W	RAD30	unknown
YDR420W	HKR1	yes
YDR421W	ARO80	yes
YDR422C	SIP1	yes
YDR423C	CAD1	unknown
YDR424C	DYN2	unknown
YDR425W	SNX41	yes
YDR427W	RPN9	yes
YDR428C		yes
YDR429C	TIF35	yes
YDR430C	CYM1	yes
YDR432W	NPL3	yes
YDR434W	GPI17	yes
YDR435C	PPM1	unknown
YDR436W	PPZ2	yes
YDR437W	GPI19	unknown
YDR438W	THI74	unknown
YDR439W	LRS4	yes
YDR440W	DOT1	yes
YDR441C	APT2	unknown
YDR443C	SSN2	yes
YDR444W		yes
YDR446W	ECM11	yes
YDR447C	RPS17B	yes
YDR448W	ADA2	unknown
YDR449C	UTP6	unknown
YDR450W	RPS18A	yes
YDR451C	YHP1	yes
YDR452W	PPN1	yes
YDR453C	TSA2	unknown
YDR454C	GUK1	yes
YDR456W	NHX1	yes
YDR457W	TOM1	yes
YDR458C	HEH2	yes
YDR459C	PFA5	yes
YDR460W	TFB3	yes
YDR461C-A		unknown
YDR461W	MFA1	unknown
YDR462W	MRPL28	unknown
YDR463W	STP1	yes
YDR464W	SPP41	yes
YDR465C	RMT2	yes
YDR466W	PKH3	yes
YDR468C	TLG1	unknown
YDR469W	SDC1	yes
YDR470C	UGO1	unknown
YDR471W	RPL27B	yes
YDR472W	TRS31	yes
YDR473C	PRP3	yes
YDR475C	JIP4	yes
YDR476C		unknown
YDR477W	SNF1	yes
YDR478W	SNM1	yes
YDR479C	PEX29	yes
YDR480W	DIG2	yes
YDR481C	PHO8	yes
YDR482C	CWC21	unknown
YDR483W	KRE2	unknown
YDR484W	VPS52	yes
YDR485C	VPS72	yes
YDR486C	VPS60	yes
YDR487C	RIB3	yes
YDR488C	PAC11	unknown
YDR489W	SLD5	yes
YDR490C	PKH1	yes
YDR492W	IZH1	unknown
YDR493W	FMP36	unknown
YDR494W	RSM28	yes
YDR495C	VPS3	yes
YDR496C	PUF6	yes
YDR497C	ITR1	yes
YDR498C	SEC20	unknown
YDR499W	LCD1	yes
YDR500C	RPL37B	unknown
YDR501W	PLM2	yes
YDR502C	SAM2	yes
YDR503C	LPP1	unknown
YDR504C	SPG3	unknown
YDR505C	PSP1	yes
YDR506C		yes
YDR507C	GIN4	yes
YDR508C	GNP1	yes
YDR510W	SMT3	yes
YDR511W	ACN9	unknown
YDR512C	EMI1	unknown
YDR513W	GRX2	yes
YDR514C		unknown
YDR515W	SLF1	yes
YDR516C	EMI2	yes
YDR517W	GRH1	yes
YDR518W	EUG1	unknown
YDR519W	FPR2	unknown
YDR520C		unknown
YDR522C	SPS2	unknown
YDR523C	SPS1	unknown
YDR524C	AGE1	unknown
YDR524C-B		unknown
YDR524W-C		yes
YDR525W-A	SNA2	yes
YDR527W	RBA50	yes
YDR528W	HLR1	yes
YDR529C	QCR7	unknown
YDR530C	APA2	yes
YDR531W		yes
YDR532C		yes
YDR533C	HSP31	unknown
YDR534C	FIT1	unknown
YDR536W	STL1	yes
YDR538W	PAD1	unknown
YDR539W		yes
YDR540C	IRC4	unknown
YDR541C		unknown
YDR542W	PAU10	unknown
YDR545W	YRF1-1	yes
YEL001C	IRC22	unknown
YEL002C	WBP1	unknown
YEL003W	GIM4	unknown
YEL004W	YEA4	unknown
YEL005C	VAB2	unknown
YEL006W	YEA6	yes
YEL007W		yes
YEL009C	GCN4	yes
YEL011W	GLC3	yes
YEL012W	UBC8	unknown
YEL013W	VAC8	yes
YEL015W	EDC3	yes
YEL016C	NPP2	unknown
YEL017C-A	PMP2	unknown
YEL017W	GTT3	yes
YEL018W	EAF5	unknown
YEL019C	MMS21	unknown
YEL020C		unknown
YEL020W-A	TIM9	unknown
YEL021W	URA3	yes
YEL022W	GEA2	yes
YEL023C		unknown
YEL024W	RIP1	unknown
YEL025C		yes
YEL026W	SNU13	unknown
YEL027W	CUP5	unknown
YEL029C	BUD16	unknown
YEL030W	ECM10	yes
YEL031W	SPF1	yes
YEL032W	MCM3	yes
YEL034W	HYP2	yes
YEL035C	UTR5	unknown
YEL036C	ANP1	unknown
YEL037C	RAD23	yes
YEL038W	UTR4	unknown
YEL039C	CYC7	unknown
YEL040W	UTR2	yes
YEL041W	YEF1	yes
YEL042W	GDA1	unknown
YEL043W		yes
YEL044W	IES6	unknown
YEL046C	GLY1	yes
YEL047C		yes
YEL048C		unknown
YEL049W	PAU2	unknown
YEL050C	RML2	unknown
YEL051W	VMA8	unknown
YEL052W	AFG1	yes
YEL053C	MAK10	unknown
YEL054C	RPL12A	yes
YEL055C	POL5	yes
YEL056W	HAT2	unknown
YEL057C		unknown
YEL058W	PCM1	yes
YEL059C-A	SOM1	unknown
YEL060C	PRB1	yes
YEL061C	CIN8	yes
YEL062W	NPR2	yes
YEL063C	CAN1	yes
YEL064C	AVT2	unknown
YEL065W	SIT1	unknown
YEL066W	HPA3	unknown
YEL067C		unknown
YEL069C	HXT13	yes
YEL070W	DSF1	yes
YEL071W	DLD3	yes
YEL072W	RMD6	yes
YEL073C		unknown
YEL075C		unknown
YEL076C		unknown
YEL076C-A		unknown
YEL077C		unknown
YER001W	MNN1	unknown
YER002W	NOP16	yes
YER003C	PMI40	yes
YER004W	FMP52	unknown
YER005W	YND1	yes
YER006W	NUG1	yes
YER007C-A	TMA20	yes
YER007W	PAC2	unknown
YER008C	SEC3	yes
YER009W	NTF2	unknown
YER010C		yes
YER011W	TIR1	unknown
YER012W	PRE1	yes
YER013W	PRP22	yes
YER014C-A	BUD25	unknown
YER014W	HEM14	yes
YER015W	FAA2	yes
YER016W	BIM1	yes
YER017C	AFG3	unknown
YER018C	SPC25	unknown
YER019C-A	SBH2	unknown
YER019W	ISC1	yes
YER020W	GPA2	yes
YER021W	RPN3	yes
YER022W	SRB4	yes
YER023W	PRO3	yes
YER024W	YAT2	yes
YER025W	GCD11	yes
YER026C	CHO1	yes
YER027C	GAL83	yes
YER028C	MIG3	unknown
YER029C	SMB1	unknown
YER030W	CHZ1	yes
YER031C	YPT31	yes
YER032W	FIR1	yes
YER033C	ZRG8	yes
YER034W		unknown
YER035W	EDC2	unknown
YER036C	ARB1	yes
YER037W	PHM8	unknown
YER038C	KRE29	yes
YER039C	HVG1	unknown
YER039C-A		unknown
YER040W	GLN3	yes
YER041W	YEN1	yes
YER042W	MXR1	yes
YER043C	SAH1	yes
YER044C	ERG28	unknown
YER044C-A	MEI4	yes
YER045C	ACA1	yes
YER046W	SPO73	unknown
YER047C	SAP1	yes
YER048C	CAJ1	yes
YER048W-A	ISD11	unknown
YER049W	TPA1	yes
YER050C	RSM18	unknown
YER051W	JHD1	unknown
YER052C	HOM3	yes
YER053C	PIC2	unknown
YER053C-A		unknown
YER054C	GIP2	yes
YER055C	HIS1	yes
YER056C	FCY2	yes
YER056C-A	RPL34A	yes
YER057C	HMF1	yes
YER058W	PET117	unknown
YER059W	PCL6	yes
YER060W	FCY21	yes
YER060W-A	FCY22	unknown
YER061C	CEM1	unknown
YER062C	HOR2	yes
YER063W	THO1	yes
YER064C		unknown
YER065C	ICL1	yes
YER066W		unknown
YER067W		yes
YER068W	MOT2	yes
YER069W	ARG5,6	yes
YER070W	RNR1	yes
YER071C		unknown
YER072W	VTC1	unknown
YER073W	ALD5	yes
YER074W	RPS24A	yes
YER074W-A	YOS1	unknown
YER075C	PTP3	yes
YER076C		yes
YER077C		yes
YER078C		unknown
YER078W-A		unknown
YER079W		yes
YER080W	FMP29	unknown
YER081W	SER3	yes
YER082C	UTP7	unknown
YER083C	GET2	yes
YER085C		unknown
YER086W	ILV1	unknown
YER087C-B	SBH1	yes
YER087W		yes
YER088C	DOT6	yes
YER089C	PTC2	yes
YER090W	TRP2	yes
YER091C	MET6	yes
YER092W	IES5	yes
YER093C	TSC11	yes
YER093C-A		unknown
YER094C	PUP3	yes
YER095W	RAD51	unknown
YER096W	SHC1	yes
YER098W	UBP9	unknown
YER099C	PRS2	yes
YER100W	UBC6	yes
YER101C	AST2	unknown
YER102W	RPS8B	yes
YER103W	SSA4	yes
YER104W	RTT105	yes
YER105C	NUP157	yes
YER106W	MAM1	yes
YER107C	GLE2	yes
YER109C	FLO8	yes
YER110C	KAP123	yes
YER111C	SWI4	yes
YER112W	LSM4	yes
YER113C	TMN3	yes
YER114C	BOI2	yes
YER115C	SPR6	unknown
YER116C	SLX8	yes
YER117W	RPL23B	yes
YER118C	SHO1	yes
YER119C	AVT6	yes
YER120W	SCS2	yes
YER121W		unknown
YER122C	GLO3	yes
YER123W	YCK3	yes
YER124C	DSE1	unknown
YER125W	RSP5	yes
YER126C	NSA2	unknown
YER127W	LCP5	yes
YER128W		yes
YER129W	SAK1	yes
YER130C		yes
YER131W	RPS26B	yes
YER132C	PMD1	yes
YER133W	GLC7	yes
YER134C		yes
YER136W	GDI1	yes
YER137C		yes
YER138W-A		unknown
YER139C		unknown
YER140W		yes
YER141W	COX15	yes
YER142C	MAG1	yes
YER143W	DDI1	yes
YER144C	UBP5	unknown
YER145C	FTR1	yes
YER146W	LSM5	unknown
YER147C	SCC4	yes
YER148W	SPT15	yes
YER149C	PEA2	yes
YER150W	SPI1	unknown
YER151C	UBP3	yes
YER152C		yes
YER153C	PET122	unknown
YER154W	OXA1	unknown
YER155C	BEM2	yes
YER156C		unknown
YER157W	COG3	yes
YER158C		yes
YER159C	BUR6	yes
YER161C	SPT2	yes
YER162C	RAD4	yes
YER163C		yes
YER164W	CHD1	yes
YER165W	PAB1	yes
YER166W	DNF1	yes
YER167W	BCK2	yes
YER168C	CCA1	yes
YER169W	RPH1	yes
YER170W	ADK2	unknown
YER171W	RAD3	yes
YER172C	BRR2	yes
YER173W	RAD24	yes
YER174C	GRX4	yes
YER175C	TMT1	yes
YER175W-A		unknown
YER176W	ECM32	yes
YER177W	BMH1	yes
YER178W	PDA1	yes
YER179W	DMC1	unknown
YER180C	ISC10	unknown
YER180C-A	SLO1	yes
YER182W	FMP10	unknown
YER183C	FAU1	unknown
YER184C		unknown
YER185W		yes
YER186C		unknown
YER187W		unknown
YER188C-A		unknown
YER189W		unknown
YER190C-B		unknown
YER190W	YRF1-2	unknown
YFL001W	DEG1	yes
YFL002C	SPB4	yes
YFL003C	MSH4	yes
YFL004W	VTC2	yes
YFL005W	SEC4	yes
YFL007W	BLM10	yes
YFL008W	SMC1	yes
YFL009W	CDC4	yes
YFL010C	WWM1	yes
YFL010W-A	AUA1	unknown
YFL011W	HXT10	yes
YFL012W		unknown
YFL013C	IES1	yes
YFL014W	HSP12	yes
YFL016C	MDJ1	unknown
YFL017C	GNA1	unknown
YFL017W-A	SMX2	unknown
YFL018C	LPD1	unknown
YFL020C	PAU5	unknown
YFL021W	GAT1	yes
YFL022C	FRS2	yes
YFL023W	BUD27	yes
YFL024C	EPL1	yes
YFL025C	BST1	unknown
YFL026W	STE2	yes
YFL027C	GYP8	yes
YFL028C	CAF16	unknown
YFL029C	CAK1	yes
YFL030W	AGX1	unknown
YFL031W	HAC1	yes
YFL033C	RIM15	yes
YFL034C-A	RPL22B	unknown
YFL034C-B	MOB2	yes
YFL034W		yes
YFL036W	RPO41	unknown
YFL037W	TUB2	yes
YFL038C	YPT1	yes
YFL039C	ACT1	yes
YFL040W		unknown
YFL041W	FET5	yes
YFL041W-A		unknown
YFL042C		yes
YFL044C	OTU1	yes
YFL045C	SEC53	yes
YFL046W	FMP32	yes
YFL047W	RGD2	yes
YFL048C	EMP47	unknown
YFL049W	SWP82	yes
YFL050C	ALR2	yes
YFL051C		unknown
YFL052W		unknown
YFL053W	DAK2	yes
YFL054C		yes
YFL055W	AGP3	yes
YFL056C	AAD6	unknown
YFL057C	AAD16	unknown
YFL058W	THI5	unknown
YFL059W	SNZ3	yes
YFL060C	SNO3	unknown
YFL061W	DDI2	unknown
YFL062W	COS4	unknown
YFL064C		unknown
YFL065C		unknown
YFL066C		unknown
YFL067W		unknown
YFL068W		unknown
YFR001W	LOC1	yes
YFR002W	NIC96	yes
YFR003C	YPI1	yes
YFR004W	RPN11	yes
YFR005C	SAD1	yes
YFR006W		unknown
YFR007W		unknown
YFR008W	FAR7	unknown
YFR009W	GCN20	yes
YFR010W	UBP6	yes
YFR011C		yes
YFR012W		unknown
YFR012W-A		unknown
YFR013W	IOC3	unknown
YFR014C	CMK1	yes
YFR015C	GSY1	yes
YFR016C		yes
YFR017C		yes
YFR018C		yes
YFR019W	FAB1	yes
YFR021W	ATG18	yes
YFR022W	ROG3	yes
YFR023W	PES4	unknown
YFR024C-A	LSB3	yes
YFR025C	HIS2	unknown
YFR026C		unknown
YFR027W	ECO1	yes
YFR028C	CDC14	yes
YFR029W	PTR3	unknown
YFR030W	MET10	yes
YFR031C	SMC2	yes
YFR031C-A	RPL2A	yes
YFR032C		unknown
YFR032C-A	RPL29	unknown
YFR032C-B		unknown
YFR033C	QCR6	unknown
YFR034C	PHO4	yes
YFR035C		unknown
YFR036W	CDC26	yes
YFR037C	RSC8	yes
YFR038W	IRC5	unknown
YFR039C		yes
YFR040W	SAP155	yes
YFR041C	ERJ5	unknown
YFR042W	KEG1	unknown
YFR043C	IRC6	unknown
YFR044C	DUG1	yes
YFR045W		unknown
YFR046C	CNN1	yes
YFR047C	BNA6	unknown
YFR048W	RMD8	yes
YFR049W	YMR31	yes
YFR050C	PRE4	unknown
YFR051C	RET2	yes
YFR052W	RPN12	yes
YFR053C	HXK1	yes
YFR055W	IRC7	yes
YFR057W		unknown
YGL001C	ERG26	unknown
YGL002W	ERP6	unknown
YGL003C	CDH1	yes
YGL004C	RPN14	unknown
YGL005C	COG7	yes
YGL006W	PMC1	unknown
YGL006W-A		unknown
YGL007C-A		unknown
YGL008C	PMA1	yes
YGL009C	LEU1	yes
YGL010W		unknown
YGL011C	SCL1	yes
YGL012W	ERG4	unknown
YGL013C	PDR1	yes
YGL014W	PUF4	yes
YGL015C		unknown
YGL016W	KAP122	yes
YGL017W	ATE1	unknown
YGL018C	JAC1	unknown
YGL019W	CKB1	yes
YGL020C	GET1	unknown
YGL021W	ALK1	yes
YGL022W	STT3	unknown
YGL023C	PIB2	yes
YGL025C	PGD1	yes
YGL026C	TRP5	yes
YGL027C	CWH41	yes
YGL028C	SCW11	unknown
YGL029W	CGR1	unknown
YGL030W	RPL30	yes
YGL031C	RPL24A	yes
YGL032C	AGA2	unknown
YGL033W	HOP2	unknown
YGL035C	MIG1	yes
YGL036W		yes
YGL037C	PNC1	yes
YGL038C	OCH1	unknown
YGL039W		unknown
YGL040C	HEM2	yes
YGL041C-B		unknown
YGL043W	DST1	yes
YGL044C	RNA15	unknown
YGL045W	RIM8	yes
YGL047W	ALG13	unknown
YGL048C	RPT6	unknown
YGL049C	TIF4632	yes
YGL050W	TYW3	yes
YGL051W	MST27	unknown
YGL053W	PRM8	unknown
YGL054C	ERV14	unknown
YGL055W	OLE1	unknown
YGL056C	SDS23	yes
YGL057C		unknown
YGL058W	RAD6	yes
YGL059W		unknown
YGL060W	YBP2	unknown
YGL061C	DUO1	yes
YGL062W	PYC1	unknown
YGL063W	PUS2	unknown
YGL064C	MRH4	yes
YGL065C	ALG2	yes
YGL066W	SGF73	yes
YGL067W	NPY1	unknown
YGL068W	MNP1	unknown
YGL070C	RPB9	yes
YGL071W	AFT1	yes
YGL073W	HSF1	yes
YGL075C	MPS2	yes
YGL076C	RPL7A	yes
YGL077C	HNM1	yes
YGL078C	DBP3	yes
YGL079W		unknown
YGL080W	FMP37	unknown
YGL081W		unknown
YGL082W		yes
YGL083W	SCY1	yes
YGL084C	GUP1	yes
YGL085W		yes
YGL086W	MAD1	yes
YGL087C	MMS2	yes
YGL089C	MF(ALPHA)2	unknown
YGL090W	LIF1	yes
YGL091C	NBP35	unknown
YGL092W	NUP145	yes
YGL093W	SPC105	yes
YGL094C	PAN2	yes
YGL095C	VPS45	yes
YGL096W	TOS8	unknown
YGL097W	SRM1	yes
YGL098W	USE1	yes
YGL099W	LSG1	yes
YGL100W	SEH1	yes
YGL101W		unknown
YGL103W	RPL28	unknown
YGL104C	VPS73	yes
YGL105W	ARC1	yes
YGL106W	MLC1	yes
YGL107C	RMD9	yes
YGL108C		unknown
YGL110C	CUE3	yes
YGL111W	NSA1	yes
YGL112C	TAF6	unknown
YGL113W	SLD3	yes
YGL114W		yes
YGL115W	SNF4	unknown
YGL116W	CDC20	yes
YGL117W		yes
YGL119W	ABC1	unknown
YGL120C	PRP43	yes
YGL121C	GPG1	unknown
YGL122C	NAB2	yes
YGL123W	RPS2	yes
YGL124C	MON1	yes
YGL125W	MET13	unknown
YGL126W	SCS3	unknown
YGL127C	SOH1	unknown
YGL128C	CWC23	unknown
YGL129C	RSM23	yes
YGL130W	CEG1	yes
YGL131C	SNT2	yes
YGL133W	ITC1	yes
YGL134W	PCL10	yes
YGL135W	RPL1B	yes
YGL136C	MRM2	yes
YGL137W	SEC27	yes
YGL138C		unknown
YGL139W	FLC3	yes
YGL140C		yes
YGL141W	HUL5	yes
YGL142C	GPI10	unknown
YGL143C	MRF1	unknown
YGL144C	ROG1	yes
YGL145W	TIP20	yes
YGL146C		unknown
YGL147C	RPL9A	yes
YGL148W	ARO2	yes
YGL150C	INO80	yes
YGL151W	NUT1	yes
YGL153W	PEX14	yes
YGL154C	LYS5	unknown
YGL155W	CDC43	unknown
YGL156W	AMS1	yes
YGL157W		unknown
YGL158W	RCK1	unknown
YGL159W		unknown
YGL160W		yes
YGL161C	YIP5	yes
YGL162W	SUT1	yes
YGL163C	RAD54	yes
YGL164C	YRB30	yes
YGL166W	CUP2	unknown
YGL167C	PMR1	yes
YGL168W	HUR1	unknown
YGL169W	SUA5	yes
YGL170C	SPO74	yes
YGL171W	ROK1	unknown
YGL172W	NUP49	unknown
YGL173C	KEM1	yes
YGL174W	BUD13	unknown
YGL175C	SAE2	yes
YGL176C		unknown
YGL178W	MPT5	yes
YGL179C	TOS3	unknown
YGL180W	ATG1	yes
YGL181W	GTS1	yes
YGL183C	MND1	unknown
YGL184C	STR3	unknown
YGL185C		unknown
YGL186C	TPN1	unknown
YGL187C	COX4	yes
YGL188C-A		unknown
YGL189C	RPS26A	yes
YGL190C	CDC55	yes
YGL191W	COX13	unknown
YGL192W	IME4	unknown
YGL193C		unknown
YGL194C	HOS2	yes
YGL194C-A		unknown
YGL195W	GCN1	yes
YGL196W		unknown
YGL197W	MDS3	yes
YGL198W	YIP4	unknown
YGL200C	EMP24	unknown
YGL201C	MCM6	yes
YGL202W	ARO8	yes
YGL203C	KEX1	yes
[truncated: 3,817 more rows]
